# Supplementary material for: Transcriptome Analysis Reveals Changes in Whole Gene Expression, Biological Process, and Molecular Functions Induced by Nickel in Jack Pine (Pinus banksiana)
Source: MDPI journal article supplement (doi:10.3390/plants12152889), 2023-08-07
Supplement: s1 [file s1]

**Table S1.** Top 100 upregulated genes from nickel treated plants compared to the water controls in *Pinus banksiana*

| Rank | Gene ID                | Res 1   | Res 2  | Res 3   | Water 1 | Water 2 | Water 3 | logFC | Adj. P. Value | UniProt Description                                                                        |
|------|------------------------|---------|--------|---------|---------|---------|---------|-------|---------------|--------------------------------------------------------------------------------------------|
| 0    | TRINITY_DN2786_c0_g1   | 767.81  | 197.57 | 545.86  | 0       | 0       | 0       | 13.96 | 0.00116       | Predicted Protein                                                                          |
| 1    | TRINITY_DN5716_c0_g1   | 2328.59 | 913.58 | 3881.87 | 0       | 7.03    | 0.41    | 13.34 | 0.00029       | Predicted Protein                                                                          |
| 2    | TRINITY_DN57079_c0_g1  | 339.53  | 238.75 | 261.65  | 0       | 0       | 0       | 13.30 | 0.00002       | Predicted Protein                                                                          |
| 3    | TRINITY_DN5965_c1_g1   | 1173.34 | 760.7  | 1106.06 | 0.33    | 0       | 0       | 13.28 | 0.00009       | Predicted Protein                                                                          |
| 4    | TRINITY_DN258556_c0_g1 | 280.75  | 98.46  | 494.55  | 0       | 0       | 0       | 13.09 | 0.00181       | Predicted Protein                                                                          |
| 5    | TRINITY_DN1368_c0_g1   | 1156.77 | 736.4  | 2060.57 | 0       | 1.3     | 0.07    | 12.99 | 0.00047       | Predicted Protein                                                                          |
| 6    | TRINITY_DN2832_c0_g1   | 334.2   | 111.71 | 258.08  | 0       | 0       | 0       | 12.93 | 0.00056       | Predicted Protein                                                                          |
| 7    | TRINITY_DN1628_c0_g1   | 646.38  | 288.02 | 710.02  | 0       | 0.32    | 0       | 12.82 | 0.00065       | Trypsin inhibitor<br>[Cleaved into: Trypsin inhibitor chain A; Trypsin inhibitor chain B ] |
| 8    | TRINITY_DN7061_c1_g1   | 158.35  | 218.82 | 172.81  | 0       | 0       | 0       | 12.69 | 0.00000       | Predicted Protein                                                                          |
| 9    | TRINITY_DN690_c0_g1    | 494.67  | 136.83 | 407.74  | 0.05    | 0       | 0       | 12.50 | 0.00181       | Predicted Protein                                                                          |
| 10   | TRINITY_DN5795_c0_g1   | 753.52  | 420.03 | 412.9   | 0       | 0.84    | 0       | 12.43 | 0.00032       | Predicted Protein                                                                          |
| 11   | TRINITY_DN1520_c0_g1   | 398.05  | 358.51 | 936.72  | 0.02    | 0.65    | 0       | 11.81 | 0.00043       | Trypsin inhibitor<br>[Cleaved into: Trypsin inhibitor chain A; Trypsin inhibitor chain B ] |
| 12   | TRINITY_DN3861_c0_g1   | 179.52  | 38.1   | 108.51  | 0       | 0       | 0       | 11.70 | 0.00251       | Predicted Protein                                                                          |
| 13   | TRINITY_DN40097_c0_g1  | 440.62  | 297.68 | 1698.09 | 0       | 3.39    | 0.69    | 11.62 | 0.00080       | Predicted Protein                                                                          |
| 14   | TRINITY_DN2463_c0_g1   | 301.76  | 196.16 | 568.86  | 0       | 0.04    | 0.11    | 11.56 | 0.00056       | Predicted Protein                                                                          |
| 15   | TRINITY_DN4524_c0_g3   | 64.05   | 74.91  | 115.6   | 0       | 0       | 0       | 11.54 | 0.00002       | Predicted Protein                                                                          |
| 16   | TRINITY_DN792_c0_g1    | 149.05  | 126.17 | 86.37   | 0       | 0.03    | 0       | 11.54 | 0.00004       | ACT domain-containing protein ACR4 (Protein ACT DOMAIN REPEATS 4)                          |
| 17   | TRINITY_DN792_c0_g1    | 149.05  | 126.17 | 86.37   | 0       | 0.03    | 0       | 11.54 | 0.00004       | ACT domain-containing protein ACR5 (Protein                                                |

|    |                        |        |        |        |      |      |   |       |         |                                                                                                                  |
|----|------------------------|--------|--------|--------|------|------|---|-------|---------|------------------------------------------------------------------------------------------------------------------|
|    |                        |        |        |        |      |      |   |       |         | ACT DOMAIN REPEATS<br>5)                                                                                         |
| 18 | TRINITY_DN129489_c0_g1 | 125.97 | 40.97  | 102.59 | 0    | 0    | 0 | 11.53 | 0.00085 | Predicted Protein                                                                                                |
| 19 | TRINITY_DN2914_c0_g1   | 134.07 | 79.52  | 144.69 | 0    | 0.03 | 0 | 11.51 | 0.00014 | Protein TIFY 10b,<br>OsTIFY10b (Jasmonate<br>ZIM domain-containing<br>protein 7, OsJAZ7)<br>(OsJAZ6)             |
| 20 | TRINITY_DN2914_c0_g1   | 134.07 | 79.52  | 144.69 | 0    | 0.03 | 0 | 11.51 | 0.00014 | Protein TIFY 3B<br>(Jasmonate ZIM domain-<br>containing protein 12)                                              |
| 21 | TRINITY_DN3536_c0_g1   | 51.58  | 119.55 | 84.19  | 0    | 0    | 0 | 11.51 | 0.00001 | Predicted Protein                                                                                                |
| 22 | TRINITY_DN1537_c0_g1   | 64.53  | 90.63  | 76.46  | 0    | 0    | 0 | 11.44 | 0.00000 | Predicted Protein                                                                                                |
| 23 | TRINITY_DN2075_c1_g1   | 81.81  | 56.05  | 84.87  | 0    | 0    | 0 | 11.38 | 0.00005 | Predicted Protein                                                                                                |
| 24 | TRINITY_DN12750_c0_g1  | 93.87  | 62.85  | 64.95  | 0    | 0    | 0 | 11.37 | 0.00005 | Predicted Protein                                                                                                |
| 25 | TRINITY_DN3685_c0_g2   | 524.13 | 169.45 | 298.36 | 0.01 | 0.58 | 0 | 11.33 | 0.00171 | Copia protein (Gag-int-<br>pol protein) [Cleaved<br>into: Copia VLP protein;<br>Copia protease, EC<br>3.4.23.- ] |
| 26 | TRINITY_DN3069_c0_g1   | 310.77 | 133.21 | 112.57 | 0    | 0.37 | 0 | 11.16 | 0.00120 | Predicted Protein                                                                                                |
| 27 | TRINITY_DN4477_c1_g1   | 58.41  | 73.47  | 40.83  | 0    | 0    | 0 | 11.00 | 0.00002 | Predicted Protein                                                                                                |
| 28 | TRINITY_DN9955_c0_g1   | 42.57  | 42.66  | 81.29  | 0    | 0    | 0 | 10.91 | 0.00007 | Predicted Protein                                                                                                |
| 29 | TRINITY_DN3861_c0_g2   | 73.03  | 22.1   | 87.52  | 0    | 0    | 0 | 10.90 | 0.00200 | Predicted Protein                                                                                                |
| 30 | TRINITY_DN2496_c0_g1   | 164.42 | 56.24  | 74.78  | 0    | 0.08 | 0 | 10.89 | 0.00111 | Predicted Protein                                                                                                |
| 31 | TRINITY_DN3195_c0_g2   | 97.14  | 27.64  | 44.27  | 0    | 0    | 0 | 10.82 | 0.00125 | Predicted Protein                                                                                                |
| 32 | TRINITY_DN13148_c0_g2  | 149.44 | 53.58  | 71     | 0.03 | 0    | 0 | 10.80 | 0.00087 | Predicted Protein                                                                                                |
| 33 | TRINITY_DN8563_c1_g1   | 81.63  | 24.89  | 51.8   | 0    | 0    | 0 | 10.76 | 0.00105 | Predicted Protein                                                                                                |
| 34 | TRINITY_DN4828_c0_g1   | 77.75  | 87.05  | 75     | 0    | 0.07 | 0 | 10.73 | 0.00002 | Predicted Protein                                                                                                |
| 35 | TRINITY_DN1453_c1_g4   | 164.09 | 61.99  | 144.64 | 0    | 0.3  | 0 | 10.72 | 0.00143 | Predicted Protein                                                                                                |
| 36 | TRINITY_DN1031_c0_g1   | 92.79  | 147.67 | 132.23 | 0    | 0.42 | 0 | 10.65 | 0.00004 | Putative cysteine-rich<br>repeat secretory protein<br>17                                                         |

|    |                        |        |        |        |      |      |      |       |         |                                                                                                                                                               |
|----|------------------------|--------|--------|--------|------|------|------|-------|---------|---------------------------------------------------------------------------------------------------------------------------------------------------------------|
| 37 | TRINITY_DN17_c0_g2     | 50.63  | 58.32  | 26.97  | 0    | 0    | 0    | 10.62 | 0.00006 | RING-H2 finger protein<br>ATL60, EC 2.3.2.27<br>(RING-type E3 ubiquitin<br>transferase ATL60)                                                                 |
| 38 | TRINITY_DN1299_c1_g1   | 32.6   | 35.97  | 67.12  | 0    | 0    | 0    | 10.60 | 0.00007 | Predicted Protein                                                                                                                                             |
| 39 | TRINITY_DN2516_c0_g1   | 445.31 | 249.4  | 199.81 | 0.02 | 0.63 | 0.07 | 10.58 | 0.00032 | Predicted Protein                                                                                                                                             |
| 40 | TRINITY_DN1518_c0_g1   | 96.36  | 25.43  | 28.14  | 0    | 0    | 0    | 10.56 | 0.00213 | Predicted Protein                                                                                                                                             |
| 41 | TRINITY_DN678_c0_g1    | 132.68 | 116.88 | 131.13 | 0    | 0.61 | 0    | 10.55 | 0.00012 | Cysteine proteinase<br>inhibitor 6, AtCYS-6 (PIP-<br>M) (PRLI-interacting<br>factor M)                                                                        |
| 42 | TRINITY_DN678_c0_g1    | 132.68 | 116.88 | 131.13 | 0    | 0.61 | 0    | 10.55 | 0.00012 | Cysteine proteinase<br>inhibitor 3, AtCYS-3                                                                                                                   |
| 43 | TRINITY_DN678_c0_g1    | 132.68 | 116.88 | 131.13 | 0    | 0.61 | 0    | 10.55 | 0.00012 | Multicystatin, MC                                                                                                                                             |
| 44 | TRINITY_DN125473_c0_g2 | 65.02  | 24.25  | 42.52  | 0    | 0    | 0    | 10.54 | 0.00058 | Predicted Protein                                                                                                                                             |
| 45 | TRINITY_DN103008_c0_g1 | 216.81 | 147.31 | 109.01 | 0.08 | 0.1  | 0    | 10.48 | 0.00022 | Predicted Protein                                                                                                                                             |
| 46 | TRINITY_DN6089_c0_g1   | 96.41  | 139.06 | 110.48 | 0    | 0.52 | 0    | 10.47 | 0.00004 | Predicted Protein                                                                                                                                             |
| 47 | TRINITY_DN630_c0_g1    | 70.97  | 43.91  | 146.42 | 0    | 0.16 | 0    | 10.40 | 0.00127 | Protein SRG1, AtSRG1<br>(Protein SENESCENCE-<br>RELATED GENE 1)                                                                                               |
| 48 | TRINITY_DN630_c0_g1    | 70.97  | 43.91  | 146.42 | 0    | 0.16 | 0    | 10.40 | 0.00127 | Jasmonate-induced<br>oxygenase 4, EC 1.14.11.-<br>(2-oxoglutarate-<br>dependent dioxygenase<br>JOX4) (Anthocyanidin<br>synthase) (Jasmonic acid<br>oxidase 4) |
| 49 | TRINITY_DN630_c0_g1    | 70.97  | 43.91  | 146.42 | 0    | 0.16 | 0    | 10.40 | 0.00127 | Codeine O-demethylase,<br>EC 1.14.11.32                                                                                                                       |
| 50 | TRINITY_DN630_c0_g1    | 70.97  | 43.91  | 146.42 | 0    | 0.16 | 0    | 10.40 | 0.00127 | S-norococlaurine synthase<br>1, CjNCS1, EC 4.2.1.78                                                                                                           |
| 51 | TRINITY_DN1958_c0_g1   | 34.95  | 25.92  | 54.49  | 0    | 0    | 0    | 10.38 | 0.00015 | Predicted Protein                                                                                                                                             |
| 52 | TRINITY_DN3889_c0_g1   | 414.11 | 167.54 | 300.23 | 0    | 0.98 | 0.57 | 10.37 | 0.00068 | Predicted Protein                                                                                                                                             |

|    |                       |        |        |        |      |      |      |       |         |                                                                                                                                                                        |
|----|-----------------------|--------|--------|--------|------|------|------|-------|---------|------------------------------------------------------------------------------------------------------------------------------------------------------------------------|
| 53 | TRINITY_DN4195_c0_g1  | 47.94  | 20.18  | 47.91  | 0    | 0    | 0    | 10.36 | 0.00056 | Predicted Protein                                                                                                                                                      |
| 54 | TRINITY_DN50999_c1_g1 | 44.58  | 72.78  | 14     | 0    | 0    | 0    | 10.35 | 0.00092 | Predicted Protein                                                                                                                                                      |
| 55 | TRINITY_DN5723_c0_g1  | 147.25 | 109.75 | 89.9   | 0.01 | 0.19 | 0    | 10.34 | 0.00014 | Predicted Protein                                                                                                                                                      |
| 56 | TRINITY_DN4424_c0_g1  | 47.33  | 16.14  | 56.98  | 0    | 0    | 0    | 10.33 | 0.00157 | Predicted Protein                                                                                                                                                      |
| 57 | TRINITY_DN1307_c0_g1  | 16.43  | 96.5   | 26.64  | 0    | 0    | 0    | 10.30 | 0.00055 | Germin-like protein 1-1<br>(Germin-like protein 4,<br>OsGER4)                                                                                                          |
| 58 | TRINITY_DN1307_c0_g1  | 16.43  | 96.5   | 26.64  | 0    | 0    | 0    | 10.30 | 0.00055 | Germin-like protein<br>subfamily 2 member 2                                                                                                                            |
| 59 | TRINITY_DN8008_c0_g1  | 41.17  | 24.54  | 37.72  | 0    | 0    | 0    | 10.26 | 0.00013 | Predicted Protein                                                                                                                                                      |
| 60 | TRINITY_DN5391_c1_g1  | 39.5   | 79.43  | 11.5   | 0    | 0    | 0    | 10.24 | 0.00179 | Predicted Protein                                                                                                                                                      |
| 61 | TRINITY_DN5136_c0_g1  | 45.05  | 28.07  | 26.97  | 0    | 0    | 0    | 10.21 | 0.00012 | Predicted Protein                                                                                                                                                      |
| 62 | TRINITY_DN71807_c0_g1 | 29.61  | 23.8   | 49.04  | 0    | 0    | 0    | 10.21 | 0.00014 | Predicted Protein                                                                                                                                                      |
| 63 | TRINITY_DN10435_c0_g1 | 688.04 | 977.43 | 155.25 | 0.18 | 0.41 | 0.11 | 10.17 | 0.00093 | Glucan endo-1,3-beta-<br>glucosidase, acidic<br>isoform, EC 3.2.1.39 ((1-<br>>3)-beta-glucan<br>endohydrolase, (1->3)-<br>beta-glucanase) (Beta-1,3-<br>endoglucanase) |
| 64 | TRINITY_DN1644_c0_g1  | 42.57  | 17.5   | 40.38  | 0    | 0    | 0    | 10.15 | 0.00061 | NAC transcription factor<br>47 (NAC domain-<br>containing protein 47,<br>ANAC047) (Protein<br>SPEEDY HYPONASTIC<br>GROWTH)                                             |
| 65 | TRINITY_DN1472_c0_g1  | 212.32 | 210.54 | 174.12 | 0.02 | 0.16 | 0.1  | 10.15 | 0.00002 | Triacylglycerol lipase<br>OBL1, EC 3.1.1.- (Oil body<br>lipase 1, NtOBL1)                                                                                              |
| 66 | TRINITY_DN8703_c1_g1  | 20.94  | 68.98  | 20.74  | 0    | 0    | 0    | 10.14 | 0.00014 | Predicted Protein                                                                                                                                                      |
| 67 | TRINITY_DN30360_c0_g2 | 32.32  | 41.67  | 19.9   | 0    | 0    | 0    | 10.09 | 0.00004 | Predicted Protein                                                                                                                                                      |
| 68 | TRINITY_DN690_c1_g1   | 36.04  | 15     | 46.52  | 0    | 0    | 0    | 10.06 | 0.00098 | Predicted Protein                                                                                                                                                      |
| 69 | TRINITY_DN2595_c0_g1  | 34.43  | 14.93  | 48.4   | 0    | 0    | 0    | 10.06 | 0.00100 | Predicted Protein                                                                                                                                                      |

|    |                        |        |        |         |      |      |      |       |         |                   |
|----|------------------------|--------|--------|---------|------|------|------|-------|---------|-------------------|
| 70 | TRINITY_DN5044_c1_g1   | 3556.6 | 1665.8 | 4959.49 | 2.92 | 5.34 | 0.16 | 10.06 | 0.00002 | Predicted Protein |
| 71 | TRINITY_DN2691_c0_g1   | 93.28  | 347.62 | 74.23   | 0    | 0.14 | 0.33 | 10.04 | 0.00108 | Predicted Protein |
| 72 | TRINITY_DN59057_c0_g1  | 979.45 | 270.63 | 1164.92 | 0.55 | 2.6  | 0    | 10.03 | 0.00106 | Predicted Protein |
| 73 | TRINITY_DN5965_c0_g1   | 159.21 | 70.92  | 203.21  | 0.07 | 0.21 | 0    | 10.00 | 0.00161 | Predicted Protein |
| 74 | TRINITY_DN7685_c0_g1   | 69.15  | 75.78  | 88.19   | 0    | 0.41 | 0    | 9.99  | 0.00010 | Predicted Protein |
| 75 | TRINITY_DN25430_c0_g1  | 14.61  | 23.03  | 66.45   | 0    | 0    | 0    | 9.99  | 0.00091 | Predicted Protein |
| 76 | TRINITY_DN1507_c0_g1   | 26.74  | 27.5   | 28.46   | 0    | 0    | 0    | 9.97  | 0.00002 | Predicted Protein |
| 77 | TRINITY_DN183161_c0_g1 | 38.89  | 15.66  | 33.33   | 0    | 0    | 0    | 9.96  | 0.00062 | Predicted Protein |
| 78 | TRINITY_DN2540_c0_g1   | 65.96  | 51.15  | 17.44   | 0    | 0.05 | 0    | 9.95  | 0.00116 | Predicted Protein |
| 79 | TRINITY_DN257933_c1_g1 | 22.27  | 33.69  | 26.6    | 0    | 0    | 0    | 9.95  | 0.00001 | Predicted Protein |
| 80 | TRINITY_DN15707_c0_g1  | 40.5   | 12.74  | 34.71   | 0    | 0    | 0    | 9.90  | 0.00145 | Predicted Protein |
| 81 | TRINITY_DN122303_c0_g2 | 43.54  | 23.48  | 82.74   | 0    | 0    | 0.06 | 9.87  | 0.00149 | Predicted Protein |
| 82 | TRINITY_DN12875_c0_g1  | 368    | 113.74 | 248.93  | 0.24 | 0.34 | 0    | 9.86  | 0.00219 | Predicted Protein |
| 83 | TRINITY_DN157113_c2_g1 | 33.92  | 29.87  | 15.92   | 0    | 0    | 0    | 9.85  | 0.00013 | Predicted Protein |
| 84 | TRINITY_DN6211_c0_g1   | 26.02  | 66.59  | 9.11    | 0    | 0    | 0    | 9.84  | 0.00186 | Predicted Protein |
| 85 | TRINITY_DN5240_c1_g1   | 75.64  | 57.88  | 47.63   | 0    | 0.09 | 0.03 | 9.78  | 0.00014 | Predicted Protein |
| 86 | TRINITY_DN2454_c0_g2   | 24.25  | 22.33  | 25.85   | 0    | 0    | 0    | 9.78  | 0.00003 | Predicted Protein |
| 87 | TRINITY_DN1456_c0_g1   | 306.48 | 253.1  | 155.47  | 0.27 | 0    | 0.25 | 9.78  | 0.00018 | Predicted Protein |
| 88 | TRINITY_DN26886_c0_g1  | 61.81  | 26.91  | 40.92   | 0    | 0.09 | 0    | 9.77  | 0.00069 | Predicted Protein |
| 89 | TRINITY_DN8619_c0_g1   | 37.8   | 12.68  | 28.14   | 0    | 0    | 0    | 9.77  | 0.00109 | Predicted Protein |
| 90 | TRINITY_DN27427_c0_g1  | 48.32  | 16.08  | 14.95   | 0    | 0    | 0    | 9.71  | 0.00155 | Predicted Protein |
| 91 | TRINITY_DN5616_c1_g1   | 114.68 | 86.52  | 56.74   | 0    | 1.17 | 0    | 9.70  | 0.00072 | Predicted Protein |
| 92 | TRINITY_DN21893_c1_g1  | 11.63  | 44.29  | 22.13   | 0    | 0    | 0    | 9.67  | 0.00012 | Predicted Protein |
| 93 | TRINITY_DN7420_c0_g1   | 25.09  | 11.85  | 36.81   | 0    | 0    | 0    | 9.66  | 0.00090 | Predicted Protein |
| 94 | TRINITY_DN49749_c0_g1  | 27.49  | 17.43  | 20.17   | 0    | 0    | 0    | 9.61  | 0.00013 | Predicted Protein |
| 95 | TRINITY_DN5340_c0_g1   | 27.6   | 47.12  | 22.31   | 0    | 0.04 | 0    | 9.60  | 0.00005 | Predicted Protein |
| 96 | TRINITY_DN3840_c0_g2   | 40.87  | 29.93  | 22.16   | 0    | 0.03 | 0    | 9.58  | 0.00017 | Predicted Protein |
| 97 | TRINITY_DN237688_c0_g1 | 21.17  | 36.54  | 11.77   | 0    | 0    | 0    | 9.57  | 0.00015 | Predicted Protein |
| 98 | TRINITY_DN251401_c0_g1 | 26.95  | 28.1   | 11.66   | 0    | 0    | 0    | 9.57  | 0.00020 | Predicted Protein |
| 99 | TRINITY_DN104547_c0_g1 | 238.4  | 83.01  | 249.46  | 0.25 | 0.3  | 0    | 9.56  | 0.00258 | Predicted Protein |

|     |                     |       |       |       |      |   |   |      |         |                                                                                                                                                                                        |
|-----|---------------------|-------|-------|-------|------|---|---|------|---------|----------------------------------------------------------------------------------------------------------------------------------------------------------------------------------------|
| 100 | TRINITY_DN395_c0_g1 | 33.63 | 33.79 | 22.39 | 0.02 | 0 | 0 | 9.54 | 0.00005 | Inositol polyphosphate 5-phosphatase OCRL, EC 3.1.3.36, EC 3.1.3.56 (Inositol polyphosphate 5-phosphatase OCRL-1) (Phosphatidylinositol 3,4,5-triphosphate 5-phosphatase, EC 3.1.3.86) |
|-----|---------------------|-------|-------|-------|------|---|---|------|---------|----------------------------------------------------------------------------------------------------------------------------------------------------------------------------------------|

**Table S2.** Top 100 downregulated genes from nickel treated plants compared to the control in *Pinus banksiana*

| Rank | Gene ID                | Res 1 | Res 2 | Res 3 | Water 1 | Water 2 | Water 3 | Adj. P. Value | Protein Description                                                                                                       |
|------|------------------------|-------|-------|-------|---------|---------|---------|---------------|---------------------------------------------------------------------------------------------------------------------------|
| 0    | TRINITY_DN1118_c0_g1   | 0     | 0     | 0     | 27.63   | 15.12   | 24.7    | 4.86E-05      | Flavonol synthase/flavanone 3-hydroxylase, FLS, EC 1.14.11.9, EC 1.14.20.6                                                |
| 1    | TRINITY_DN26931_c0_g1  | 0.16  | 0     | 0     | 65.61   | 45.82   | 36.39   | 9.47E-05      | Probable aquaporin PIP2-8 (Plasma membrane intrinsic protein 2-8, AtPIP2;8) (Plasma membrane intrinsic protein 3b, PIP3b) |
| 2    | TRINITY_DN432_c0_g1    | 0     | 0.3   | 0     | 77.54   | 17.58   | 69.88   | 0.002533      | Predicted Protein                                                                                                         |
| 3    | TRINITY_DN4059_c0_g1   | 0     | 0     | 0     | 20.09   | 12.1    | 19.58   | 4.10E-05      | Predicted Protein                                                                                                         |
| 4    | TRINITY_DN30654_c0_g1  | 0     | 0     | 0     | 14.69   | 11.78   | 14.4    | 1.63E-05      | Predicted Protein                                                                                                         |
| 5    | TRINITY_DN2314_c0_g1   | 0.03  | 0.13  | 0     | 40.88   | 14.56   | 52.04   | 0.001066      | Predicted Protein                                                                                                         |
| 6    | TRINITY_DN69830_c0_g4  | 0     | 0     | 0     | 10.13   | 7.29    | 18.59   | 0.000101      | Predicted Protein                                                                                                         |
| 7    | TRINITY_DN129793_c0_g1 | 0     | 0     | 0     | 8.28    | 13.37   | 9.36    | 9.45E-06      | Putative UPF0481 protein At3g02645                                                                                        |
| 8    | TRINITY_DN40558_c0_g1  | 0.04  | 0     | 0.05  | 36.31   | 14.48   | 19.64   | 0.000432      | Predicted Protein                                                                                                         |
| 9    | TRINITY_DN522_c0_g3    | 0     | 0     | 0     | 8.24    | 4.71    | 17.93   | 0.000408      | Predicted Protein                                                                                                         |
| 10   | TRINITY_DN1550_c0_g1   | 0     | 0.07  | 0     | 18.5    | 9.11    | 17.44   | 0.000209      | Predicted Protein                                                                                                         |
| 11   | TRINITY_DN113586_c0_g1 | 0     | 0     | 0     | 7.25    | 5.74    | 13.28   | 8.70E-05      | Predicted Protein                                                                                                         |
| 12   | TRINITY_DN25689_c0_g1  | 0.06  | 0.09  | 0     | 26.01   | 16.36   | 31.07   | 0.000136      | Predicted Protein                                                                                                         |

|    |                        |      |      |      |       |       |       |          |                                                                                         |
|----|------------------------|------|------|------|-------|-------|-------|----------|-----------------------------------------------------------------------------------------|
| 13 | TRINITY_DN26605_c0_g1  | 0    | 0    | 0    | 6.61  | 7.11  | 10.35 | 2.28E-05 | Predicted Protein                                                                       |
| 14 | TRINITY_DN31123_c0_g2  | 0    | 0    | 0    | 6.35  | 8.14  | 8.67  | 1.28E-05 | Predicted Protein                                                                       |
| 15 | TRINITY_DN4890_c0_g1   | 0    | 0    | 0.17 | 15.59 | 12.05 | 25.46 | 0.000174 | Predicted Protein                                                                       |
| 16 | TRINITY_DN5062_c0_g2   | 0    | 0    | 0    | 10.4  | 7.97  | 3.99  | 0.000193 | Predicted Protein                                                                       |
| 17 | TRINITY_DN3390_c0_g1   | 0    | 0    | 0    | 9.96  | 3.94  | 7.77  | 0.000273 | Predicted Protein                                                                       |
| 18 | TRINITY_DN6314_c0_g1   | 0    | 0    | 0    | 7.61  | 6.68  | 5.98  | 2.86E-05 | Predicted Protein                                                                       |
| 19 | TRINITY_DN2507_c0_g1   | 0    | 0    | 0.61 | 32.43 | 13.12 | 23.67 | 0.000952 | Predicted Protein                                                                       |
| 20 | TRINITY_DN53932_c0_g1  | 0.01 | 0    | 0.2  | 17.81 | 11.58 | 17.09 | 0.00016  | Predicted Protein                                                                       |
| 21 | TRINITY_DN20386_c0_g1  | 0    | 0    | 0    | 7.77  | 6     | 5.13  | 5.04E-05 | Predicted Protein                                                                       |
| 22 | TRINITY_DN17540_c0_g1  | 0    | 0    | 0    | 10.32 | 6.62  | 3.33  | 0.000363 | Predicted Protein                                                                       |
| 23 | TRINITY_DN51950_c1_g1  | 0    | 0    | 0    | 6.24  | 5.15  | 7.26  | 3.46E-05 | Predicted Protein                                                                       |
| 24 | TRINITY_DN59077_c1_g1  | 0    | 0.2  | 0    | 11.37 | 9.17  | 20.15 | 0.000196 | Predicted Protein                                                                       |
| 25 | TRINITY_DN26_c1_g1     | 0    | 0    | 0    | 5.86  | 4.64  | 7.86  | 5.04E-05 | Alpha-galactosidase, EC 3.2.1.22 (Alpha-D-galactoside galactohydrolase) (Melibiase)     |
| 26 | TRINITY_DN3304_c0_g1   | 0    | 0    | 0    | 9.07  | 9.08  | 2.36  | 0.000767 | Predicted Protein                                                                       |
| 27 | TRINITY_DN229927_c0_g1 | 0    | 0    | 0    | 7.04  | 3.93  | 6.56  | 0.000106 | Predicted Protein                                                                       |
| 28 | TRINITY_DN44526_c0_g2  | 0    | 0    | 0    | 8.45  | 2.63  | 7.68  | 0.000697 | Predicted Protein                                                                       |
| 29 | TRINITY_DN185135_c0_g1 | 0.01 | 0.04 | 0    | 10.52 | 6.31  | 8.09  | 0.00011  | Predicted Protein                                                                       |
| 30 | TRINITY_DN69346_c0_g1  | 0    | 0    | 0.11 | 8.89  | 9.05  | 16.12 | 0.000102 | Predicted Protein                                                                       |
| 31 | TRINITY_DN61932_c0_g1  | 0    | 0    | 0    | 4.25  | 10.03 | 4.53  | 4.75E-05 | Predicted Protein                                                                       |
| 32 | TRINITY_DN1400_c0_g1   | 0.03 | 0.03 | 0.07 | 24.93 | 11.67 | 26.83 | 0.000432 | Subtilisin-like protease SBT5.6, EC 3.4.21.- (Subtilase subfamily 5 member 6, AtSBT5.6) |
| 33 | TRINITY_DN6996_c0_g5   | 0    | 0.12 | 0    | 12.87 | 8.76  | 10.4  | 0.000112 | Predicted Protein                                                                       |
| 34 | TRINITY_DN28592_c2_g1  | 0    | 1.27 | 0    | 25.1  | 13.73 | 26.65 | 0.000766 | Predicted Protein                                                                       |
| 35 | TRINITY_DN63981_c0_g2  | 0    | 0    | 0    | 4.48  | 4.77  | 7.31  | 3.70E-05 | Predicted Protein                                                                       |
| 36 | TRINITY_DN129749_c0_g1 | 0    | 0.12 | 0    | 9.6   | 9.98  | 11.12 | 4.47E-05 | Predicted Protein                                                                       |
| 37 | TRINITY_DN800_c0_g2    | 0    | 0    | 0    | 8     | 2.45  | 6.55  | 0.000689 | Predicted Protein                                                                       |
| 38 | TRINITY_DN1269_c0_g1   | 0.15 | 0.2  | 0    | 32.25 | 13.5  | 37.33 | 0.001037 | Predicted Protein                                                                       |
| 39 | TRINITY_DN11362_c0_g1  | 0    | 0.89 | 0.23 | 39.53 | 30.88 | 57.71 | 0.000201 | Predicted Protein                                                                       |

|    |                        |      |      |      |        |        |        |          |                                                                                                                                                                                |
|----|------------------------|------|------|------|--------|--------|--------|----------|--------------------------------------------------------------------------------------------------------------------------------------------------------------------------------|
| 40 | TRINITY_DN20766_c0_g1  | 0    | 0.07 | 0    | 10.17  | 5.57   | 10.32  | 0.000218 | Subtilisin-like protease SBT1.7, EC 3.4.21.-<br>(Cucumisin-like serine protease) (Subtilase<br>subfamily 1 member 7, AtSBT1.7)<br>(Subtilisin-like serine protease 1, At-SLP1) |
| 41 | TRINITY_DN15047_c0_g1  | 0    | 0    | 0    | 4.32   | 5.55   | 5.12   | 1.96E-05 | Predicted Protein                                                                                                                                                              |
| 42 | TRINITY_DN26605_c0_g2  | 0    | 0    | 0    | 2.45   | 6.9    | 7.85   | 0.00015  | Predicted Protein                                                                                                                                                              |
| 43 | TRINITY_DN104952_c0_g1 | 0    | 0    | 0    | 6.71   | 2.45   | 6.55   | 0.000484 | Predicted Protein                                                                                                                                                              |
| 44 | TRINITY_DN4176_c0_g1   | 0.02 | 0.33 | 0.26 | 61.56  | 18.42  | 66.16  | 0.001525 | Chalcone synthase, EC 2.3.1.74<br>(Naringenin-chalcone synthase)                                                                                                               |
| 45 | TRINITY_DN24969_c0_g1  | 0.12 | 0    | 0    | 15.57  | 5.1    | 13.9   | 0.00131  | Predicted Protein                                                                                                                                                              |
| 46 | TRINITY_DN24626_c0_g1  | 0.12 | 0.13 | 0    | 21.48  | 21.87  | 17.99  | 6.53E-05 | Predicted Protein                                                                                                                                                              |
| 47 | TRINITY_DN121_c0_g3    | 0.09 | 0.02 | 0.11 | 16.6   | 18.32  | 21.49  | 5.20E-05 | Cellulose synthase A catalytic subunit 4<br>[UDP-forming], AtCesA4, EC 2.4.1.12<br>(Protein IRREGULAR XYLEM 5, AtIRX5)                                                         |
| 48 | TRINITY_DN20218_c0_g1  | 0.02 | 0.04 | 0    | 9.8    | 8.24   | 11.28  | 5.62E-05 | Predicted Protein                                                                                                                                                              |
| 49 | TRINITY_DN5372_c0_g1   | 0    | 0    | 0    | 7.25   | 1.67   | 7.18   | 0.001777 | Predicted Protein                                                                                                                                                              |
| 50 | TRINITY_DN3173_c0_g2   | 0    | 0    | 0    | 5.65   | 2.3    | 7.09   | 0.000497 | Predicted Protein                                                                                                                                                              |
| 51 | TRINITY_DN15841_c0_g1  | 0    | 0    | 0    | 5.23   | 2.71   | 6.29   | 0.000214 | Predicted Protein                                                                                                                                                              |
| 52 | TRINITY_DN1891_c0_g3   | 0    | 0    | 0    | 6.76   | 3.67   | 3.42   | 0.000191 | Predicted Protein                                                                                                                                                              |
| 53 | TRINITY_DN15910_c0_g1  | 0.1  | 0.24 | 0.09 | 49.33  | 33.41  | 37.21  | 4.83E-05 | Predicted Protein                                                                                                                                                              |
| 54 | TRINITY_DN7784_c1_g1   | 0    | 0    | 0    | 8.87   | 2.18   | 3.94   | 0.001207 | Predicted Protein                                                                                                                                                              |
| 55 | TRINITY_DN8038_c0_g1   | 0.62 | 0.26 | 0.25 | 122.65 | 81.13  | 105.38 | 4.77E-06 | Probable aquaporin PIP2-8 (Plasma<br>membrane intrinsic protein 2-8, AtPIP2;8)<br>(Plasma membrane intrinsic protein 3b,<br>PIP3b)                                             |
| 56 | TRINITY_DN12836_c0_g1  | 0    | 0    | 0    | 7      | 3.29   | 3.35   | 0.00028  | Alpha carbonic anhydrase 7, AtCA7,<br>AtalphaCA7, EC 4.2.1.1 (Alpha carbonate<br>dehydratase 7)                                                                                |
| 57 | TRINITY_DN6386_c0_g2   | 0    | 0    | 0    | 4.88   | 3.66   | 4.48   | 5.51E-05 | Predicted Protein                                                                                                                                                              |
| 58 | TRINITY_DN7751_c0_g1   | 0    | 0    | 0    | 5.77   | 2.52   | 5.12   | 0.000267 | Predicted Protein                                                                                                                                                              |
| 59 | TRINITY_DN159567_c0_g1 | 0    | 0.32 | 0    | 11.89  | 6.31   | 15.47  | 0.000621 | WAT1-related protein At5g07050                                                                                                                                                 |
| 60 | TRINITY_DN293_c0_g1    | 0.59 | 0.32 | 0.44 | 83.3   | 131.42 | 164.86 | 4.44E-07 | Delta-selinene-like synthase, chloroplastic,<br>PsTPS-Sell, EC 4.2.3.76                                                                                                        |



|    |                        |      |      |      |        |        |        |          |                                                                                                                      |
|----|------------------------|------|------|------|--------|--------|--------|----------|----------------------------------------------------------------------------------------------------------------------|
| 61 | TRINITY_DN293_c0_g1    | 0.59 | 0.32 | 0.44 | 83.3   | 131.42 | 164.86 | 4.44E-07 | Alpha-humulene synthase, EC 4.2.3.104 (Terpene synthase TPS-Hum, PgTPS-Hum)                                          |
| 62 | TRINITY_DN293_c0_g1    | 0.59 | 0.32 | 0.44 | 83.3   | 131.42 | 164.86 | 4.44E-07 | Delta-selinene synthase, EC 4.2.3.71, EC 4.2.3.76 (Agfdse1)                                                          |
| 63 | TRINITY_DN44886_c0_g1  | 0    | 0.04 | 0    | 6.47   | 4.31   | 7.89   | 0.000134 | Predicted Protein                                                                                                    |
| 64 | TRINITY_DN71967_c0_g1  | 0    | 0    | 0    | 6.52   | 2.32   | 4.44   | 0.00046  | Predicted Protein                                                                                                    |
| 65 | TRINITY_DN87537_c1_g2  | 0    | 0    | 0    | 4.36   | 1.76   | 7.92   | 0.000982 | Predicted Protein                                                                                                    |
| 66 | TRINITY_DN63391_c0_g1  | 0    | 0    | 0    | 6.17   | 1.74   | 5.13   | 0.000994 | Predicted Protein                                                                                                    |
| 67 | TRINITY_DN50988_c0_g1  | 0.05 | 0    | 0    | 8.96   | 3.64   | 8.45   | 0.000593 | Predicted Protein                                                                                                    |
| 68 | TRINITY_DN36314_c0_g2  | 0    | 0    | 0    | 7.73   | 4.68   | 1.42   | 0.001863 | Putative anthocyanidin reductase, GbANR, EC 1.3.1.-                                                                  |
| 69 | TRINITY_DN647_c0_g2    | 0    | 0.07 | 0.06 | 15.17  | 6.47   | 13.72  | 0.00068  | Purple acid phosphatase 3, EC 3.1.3.2                                                                                |
| 70 | TRINITY_DN256198_c0_g1 | 0    | 0    | 0    | 7.86   | 4.47   | 1.34   | 0.002153 | Predicted Protein                                                                                                    |
| 71 | TRINITY_DN125084_c0_g3 | 0.03 | 0    | 0    | 5.87   | 7.75   | 3.36   | 0.000138 | Delta-selinene synthase, EC 4.2.3.71, EC 4.2.3.76 (Agfdse1)                                                          |
| 72 | TRINITY_DN22583_c0_g1  | 0    | 0    | 0    | 4.49   | 3.11   | 3.47   | 8.47E-05 | Predicted Protein                                                                                                    |
| 73 | TRINITY_DN98979_c0_g4  | 0    | 0    | 0    | 3.3    | 4.07   | 3.81   | 2.91E-05 | Probable galactinol--sucrose galactosyltransferase 6, EC 2.4.1.82 (Protein DARK INDUCIBLE 10) (Raffinose synthase 6) |
| 74 | TRINITY_DN9649_c1_g3   | 0    | 0    | 0    | 2.73   | 10.46  | 1.9    | 0.000761 | Predicted Protein                                                                                                    |
| 75 | TRINITY_DN11419_c0_g1  | 0    | 0    | 0    | 5.05   | 1.36   | 6.38   | 0.001738 | Predicted Protein                                                                                                    |
| 76 | TRINITY_DN1911_c0_g1   | 0    | 0.03 | 0.03 | 7.9    | 7.77   | 6.89   | 5.67E-05 | Predicted Protein                                                                                                    |
| 77 | TRINITY_DN2236_c0_g1   | 0.2  | 0    | 0.25 | 39.44  | 18.18  | 16.02  | 0.001027 | Predicted Protein                                                                                                    |
| 78 | TRINITY_DN250708_c0_g1 | 0    | 0    | 0    | 7.84   | 2      | 2.38   | 0.001663 | Predicted Protein                                                                                                    |
| 79 | TRINITY_DN18490_c0_g1  | 0    | 0    | 0    | 3.72   | 1.31   | 8      | 0.002018 | Predicted Protein                                                                                                    |
| 80 | TRINITY_DN7878_c0_g1   | 0.25 | 1.75 | 0.46 | 124.44 | 78.86  | 175.53 | 2.73E-06 | Predicted Protein                                                                                                    |
| 81 | TRINITY_DN3227_c0_g1   | 0    | 0    | 0    | 3.03   | 2.62   | 5.23   | 0.000109 | Predicted Protein                                                                                                    |
| 82 | TRINITY_DN83526_c0_g3  | 0    | 0    | 0    | 2.83   | 5.13   | 3      | 4.20E-05 | Predicted Protein                                                                                                    |
| 83 | TRINITY_DN1934_c0_g1   | 0.02 | 0.03 | 0.06 | 16.23  | 6.2    | 17.34  | 0.001139 | Predicted Protein                                                                                                    |
| 84 | TRINITY_DN121_c0_g1    | 0.18 | 0.1  | 0.03 | 20.19  | 22.8   | 24.32  | 2.97E-05 | Cellulose synthase A catalytic subunit 8 [UDP-forming], AtCesA8, EC 2.4.1.12                                         |

|     |                        |      |      |      |        |       |       |          |                                                                                         |
|-----|------------------------|------|------|------|--------|-------|-------|----------|-----------------------------------------------------------------------------------------|
|     |                        |      |      |      |        |       |       |          | (Protein IRREGULAR XYLEM 1, AtIRX1)<br>(Protein LEAF WILTING 2)                         |
| 85  | TRINITY_DN121_c0_g1    | 0.18 | 0.1  | 0.03 | 20.19  | 22.8  | 24.32 | 2.97E-05 | Cellulose synthase A catalytic subunit 9<br>[UDP-forming], EC 2.4.1.12 (OsCesA9)        |
| 86  | TRINITY_DN2085_c0_g1   | 0.34 | 0.57 | 0.14 | 100.49 | 52.63 | 54.79 | 3.54E-05 | Predicted Protein                                                                       |
| 87  | TRINITY_DN41388_c0_g2  | 0    | 0    | 0.04 | 3.85   | 3.14  | 9.7   | 0.000494 | Predicted Protein                                                                       |
| 88  | TRINITY_DN17036_c0_g1  | 0.06 | 0.77 | 0.19 | 41.49  | 43.27 | 52.52 | 1.13E-05 | Predicted Protein                                                                       |
| 89  | TRINITY_DN19058_c0_g1  | 0    | 0    | 0    | 2.83   | 3.41  | 3.9   | 3.74E-05 | Predicted Protein                                                                       |
| 90  | TRINITY_DN5226_c2_g1   | 0    | 0    | 0    | 3.04   | 1.9   | 6.31  | 0.000435 | Predicted Protein                                                                       |
| 91  | TRINITY_DN61279_c2_g1  | 0    | 0    | 0    | 5.99   | 1.98  | 2.71  | 0.000712 | Probable LRR receptor-like<br>serine/threonine-protein kinase At5g48740,<br>EC 2.7.11.1 |
| 92  | TRINITY_DN1794_c0_g3   | 0    | 0    | 0    | 2.16   | 2.75  | 6.48  | 0.000243 | Predicted Protein                                                                       |
| 93  | TRINITY_DN31192_c0_g2  | 0    | 0    | 0    | 3.24   | 3.3   | 3.39  | 4.09E-05 | Predicted Protein                                                                       |
| 94  | TRINITY_DN260195_c2_g2 | 0    | 0    | 0    | 3.29   | 3.18  | 3.44  | 4.45E-05 | Predicted Protein                                                                       |
| 95  | TRINITY_DN304016_c0_g1 | 0    | 0    | 0    | 3.72   | 2.27  | 4.05  | 0.000138 | Predicted Protein                                                                       |
| 96  | TRINITY_DN4245_c0_g1   | 0.06 | 0.24 | 0    | 6.69   | 11.32 | 27.52 | 0.00114  | Predicted Protein                                                                       |
| 97  | TRINITY_DN16676_c0_g2  | 0    | 0    | 0    | 3.9    | 2.93  | 2.89  | 8.31E-05 | Predicted Protein                                                                       |
| 98  | TRINITY_DN1794_c0_g1   | 0    | 0    | 0    | 3.92   | 2.16  | 3.82  | 0.000175 | Predicted Protein                                                                       |
| 99  | TRINITY_DN180254_c0_g1 | 0.01 | 0    | 0    | 4.85   | 4.11  | 5.09  | 7.03E-05 | Predicted Protein                                                                       |
| 100 | TRINITY_DN30545_c1_g1  | 0.08 | 0.08 | 0.06 | 16.07  | 11.96 | 18.36 | 0.000123 | Predicted Protein                                                                       |

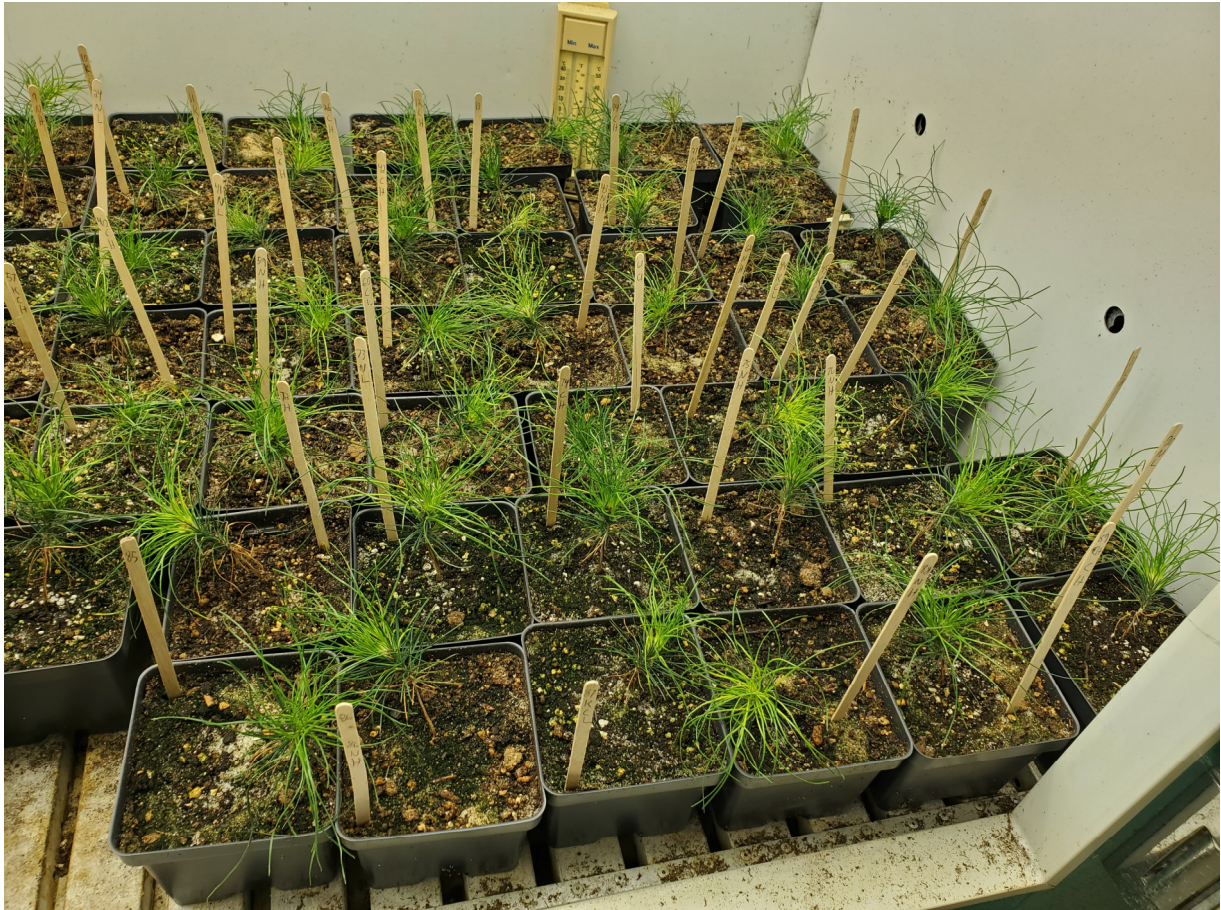

**Figure S1.** *Pinus banksiana* seedlings water growing in a growth chamber after treatments with nickel sulfate, potassium sulfate, and water.
